# Supplementary material for: Population Pharmacokinetic Analysis of Asunaprevir in Subjects with Hepatitis C Virus Infection
Source: PubMed Central journal article supplement — Infect Dis Ther. 2018 Mar 27;7(2):261–75. doi: 10.1007/s40121-018-0197-y (PMC5986681; doi:10.1007/s40121-018-0197-y), 2018-03-27
Supplement: 40121_2018_197_MOESM1_ESM.pdf [file 40121_2018_197_MOESM1_ESM.pdf]

Supplemental Table 1 Summary of Clinical Studies Included in the Population Pharmacokinetic Dataset

| <b>ClinicalTrials.gov Identifier</b>                                                                                                                                                      | <b>Study Design</b>                                                                                                                                                                                                                                                                   | <b>Population</b>                                                                                                                                             | <b>Treatment</b>                                                                                                                                                                                                                                                                                                                                                                                                                                                                                                                                                                                                                                                                                                                                                                                                                                  | <b>Planned Sample Size</b>                                                |
|-------------------------------------------------------------------------------------------------------------------------------------------------------------------------------------------|---------------------------------------------------------------------------------------------------------------------------------------------------------------------------------------------------------------------------------------------------------------------------------------|---------------------------------------------------------------------------------------------------------------------------------------------------------------|---------------------------------------------------------------------------------------------------------------------------------------------------------------------------------------------------------------------------------------------------------------------------------------------------------------------------------------------------------------------------------------------------------------------------------------------------------------------------------------------------------------------------------------------------------------------------------------------------------------------------------------------------------------------------------------------------------------------------------------------------------------------------------------------------------------------------------------------------|---------------------------------------------------------------------------|
| <p>NCT01012895<br/> <a href="https://clinicaltrials.gov/ct2/show/NCT01012895?term=AI447-011&amp;rank=1">https://clinicaltrials.gov/ct2/show/NCT01012895?term=AI447-011&amp;rank=1</a></p> | <p>Parallel, Open-Label, Randomized, Multiple-Dose Study to Evaluate the Safety, Pharmacokinetics and Pharmacodynamics of BMS-790052 and BMS-650032 (tablet formulation) in Combination in Null Responders to Standard of Care Infected with Chronic Hepatitis C Virus Genotype 1</p> | <p>Males and females 18 to 70 years of age with genotype 1 chronic HCV infection and HCV RNA &gt; 100,000 IU/mL without cirrhosis who are null-responders</p> | <p>Treatment A (DUAL) Sentinel: BMS-790052 60mg QD for up to 24 weeks, and BMS-650032 600mg BID first, then reduced on September 21, 2010 to 200mg BID for a total of up to 24 weeks</p> <p>Treatment A Expansion (DUAL): BMS-790052 60mg QD and BMS-650032 200mg QD or BID for up to 24 weeks</p> <p>Treatment B1, B2 (QUAD) Sentinel: BMS-790052 60mg QD for up to 24 weeks, and BMS-650032 600mg BID first, then reduced on September 21, 2010 to 200mg BID for a total of up to 24 weeks, with Peginterferon-alfa (QW)/ribavirin (BID) for up to 24 weeks</p> <p>Treatment B1, B2 Expansion (QUAD): BMS-790052 60mg QD and BMS-650032 200mg QD or BID, with Peginterferon-alfa (QW)/ribavirin (BID) for up to 24 weeks</p> <p>Treatment B3 (Triple): BMS-790052 60mg QD and BMS-650032 200mg BID, with ribavirin (BID) for up to 24 weeks</p> | <p>10 per sentinel group. 20 per expansion group (A1, A2, B1, B2, B3)</p> |

| <b>ClinicalTrials.gov Identifier</b>                                                                                                                                             | <b>Study Design</b>                                                                                                                                                                            | <b>Population</b>                                                                                                                                                                                                                                                                                   | <b>Treatment</b>                                                                                                                                                                                                                                                                                       | <b>Planned Sample Size</b>                                   |
|----------------------------------------------------------------------------------------------------------------------------------------------------------------------------------|------------------------------------------------------------------------------------------------------------------------------------------------------------------------------------------------|-----------------------------------------------------------------------------------------------------------------------------------------------------------------------------------------------------------------------------------------------------------------------------------------------------|--------------------------------------------------------------------------------------------------------------------------------------------------------------------------------------------------------------------------------------------------------------------------------------------------------|--------------------------------------------------------------|
| NCT01030432<br><a href="https://clinicaltrials.gov/ct2/show/NCT01030432?term=AI447-016&amp;rank=1">https://clinicaltrials.gov/ct2/show/NCT01030432?term=AI447-016&amp;rank=1</a> | A Phase2a/2b Study of BMS-650032 (tablet formulation) in Combination With Peginterferon Alfa-2a and Ribavirin in Treatment-Naive Subjects with Genotypes 1 and 4 Chronic Hepatitis C Infection | Males and females 18 to 70 years of age with chronic HCV genotype 1 and genotype 4 without cirrhosis who have not received prior anti-HCV treatment with pegIFN and RBV or other agents with anti-HCV activity (treatment naive). Subjects with decompensated cirrhosis may be included in Stage 2. | Stage 1: BMS-650032 0, 200mg BID, 600mg BID, 600mg QD (1:1:1:1) first, then reduced to 0, 200mg BID (1:3), with Peginterferon-alfa (QW)/ribavirin (BID) for 48 weeks<br><br>Stage 2: BMS-650032 0, 200mg BID (1:3) for 12 or 24 weeks, with Peginterferon-alfa (QW)/ribavirin (BID) for 24 or 48 weeks | 40 (Null-responder: 20, SOC ineligible naïve/intolerant: 20) |
| NCT01051414<br><a href="https://clinicaltrials.gov/ct2/show/NCT01051414?term=AI447-017&amp;rank=1">https://clinicaltrials.gov/ct2/show/NCT01051414?term=AI447-017&amp;rank=1</a> | Open label, Phase 2a, BMS-790052 and BMS-650032 (tablet formulation) in Combination Therapy with Japanese Subjects with Genotype 1 Chronic Hepatitis C (HCV) virus Infection                   | Males and females 20 to 75 years of age with genotype 1 chronic HCV infection without cirrhosis who are null-responder or SOC ineligible naïve/intolerant                                                                                                                                           | BMS-790052 60 mg Q24h, BMS-650032 600mg Q12h up to Week 12, changed to 200mg Q12h between Weeks 12 and 24, for 24 weeks. If prior null-responder does not respond to treatment, BMS-790052 60mg Q24h, BMS-650032 600mg Q12h, with Peginterferon-alfa (QW)/ribavirin (BID) for additional 48 weeks      | 40 (Null-responder: 20, SOC ineligible naïve/intolerant: 20) |

| ClinicalTrials.gov Identifier                                                                                                                                                    | Study Design                                                                                                                                                                                                                                                                 | Population                                                                                                                                                                                                 | Treatment                                                                                                                                                                                                                            | Planned Sample Size                                            |
|----------------------------------------------------------------------------------------------------------------------------------------------------------------------------------|------------------------------------------------------------------------------------------------------------------------------------------------------------------------------------------------------------------------------------------------------------------------------|------------------------------------------------------------------------------------------------------------------------------------------------------------------------------------------------------------|--------------------------------------------------------------------------------------------------------------------------------------------------------------------------------------------------------------------------------------|----------------------------------------------------------------|
| NCT01497834<br><a href="https://clinicaltrials.gov/ct2/show/NCT01497834?term=AI447-026&amp;rank=1">https://clinicaltrials.gov/ct2/show/NCT01497834?term=AI447-026&amp;rank=1</a> | A Phase 3 Japanese Study of BMS-790052 plus BMS-650032 (softgel formulation) Combination Therapy in Chronic Hepatitis C Genotype 1b Infected Subjects Who are Non Response to Interferon plus Ribavirin and Interferon Based Therapy Ineligible naive/intolerant             | Males and females 20 to 75 years of age with genotype 1b chronic HCV infection who are non-responders to alfa/RBV or beta/RBV, and IFN based therapy ineligible naive/intolerant subjects                  | BMS-790052 60 mg Q24h, BMS-650032 100mg Q12h, for 24 weeks. If prior null-responder does not respond to treatment, BMS-790052 60mg Q24h, BMS-650032 600mg Q12h, with Peginterferon-alfa (QW)/ribavirin (BID) for additional 24 weeks | 200 (80 prior non-responders, 120 ineligible naive/intolerant) |
| NCT01581203<br><a href="https://clinicaltrials.gov/ct2/show/NCT01581203?term=AI447-028&amp;rank=2">https://clinicaltrials.gov/ct2/show/NCT01581203?term=AI447-028&amp;rank=2</a> | A Phase 3 Study with Asunaprevir (softgel formulation) and Daclatasvir (DUAL) for Null or Partial Responders to Peginterferon Alfa and Ribavirin (P/R), Intolerant or Ineligible to P/R Subjects and Treatment-Naive Subjects with Chronic Hepatitis C Genotype 1b Infection | Males and females $\geq$ 18 years of age with genotype 1b chronic HCV infection and HCV RNA > 10,000 IU/mL who are null or partial responders, treatment-naive, or intolerant to or ineligible for Peg/RBV | BMS-790052 60 mg Q24h, BMS-650032 100mg Q12h, for 24 weeks. If does not respond to treatment, BMS-790052 60mg Q24h, BMS-650032 600mg Q12h, with Peginterferon-alfa (QW)/ribavirin (BID) for additional 24 weeks                      | 725                                                            |
